# Supplementary material for: Removal of Sulfide Ions from Kraft Washing Effluents by Photocatalysis with N and Fe Codoped Carbon Dots
Source: MDPI journal article supplement (doi:10.3390/polym15030679), 2023-01-29
Supplement: s1 [file s1]

# Removal of Sulfide Ions from Kraft Washing Effluents by Photocatalysis with N and Fe Codoped Carbon Dots

Hao Luo <sup>1</sup>, Hao Liu <sup>1\*</sup>, and Chengwu Sun <sup>2</sup>

1. State Key Laboratory of Pulp and Paper Engineering, South China University of Technology (SCUT), Guangzhou,

Guangdong 510640, China

2. Bengbu-SCUT Research Center for Advanced Manufacturing of Biomaterials, Bengbu 233010, China

## List of Supplemental Figures

**Figure S1** Automatic sampling and measurement device for photocatalytic oxidation of  $S^{2-}$

**Figure S2** Effects of  $S^{2-}$  on fluorescence intensity of N,Fe-CDs

**Figure S3** High-resolution XPS spectra of N,Fe-CDs

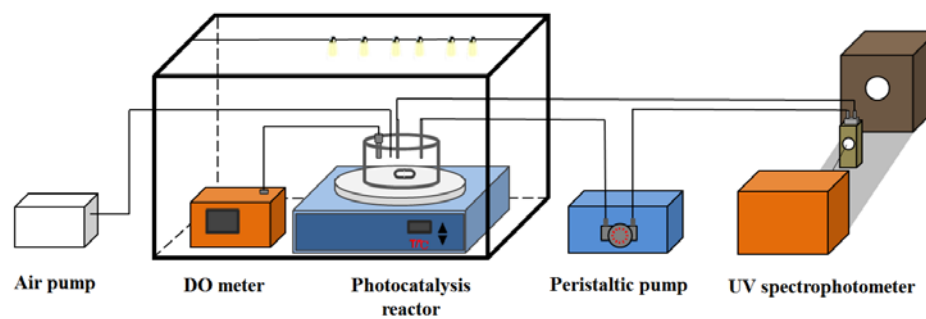

**Figure S1** Automatic sampling and measurement device for photocatalytic oxidation of  $S^{2-}$

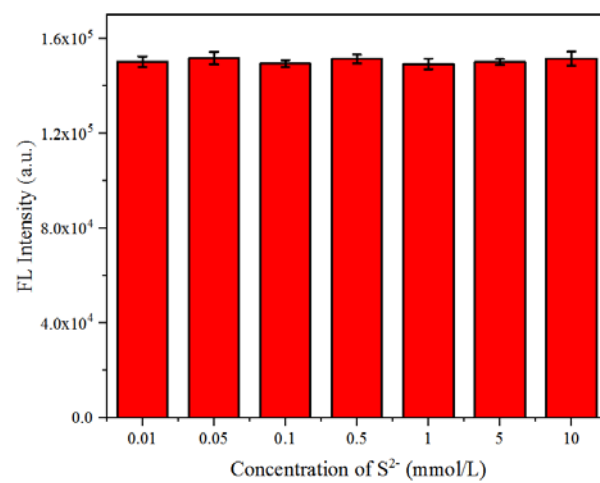

**Figure S2** Effects of S<sup>2-</sup> on fluorescence intensity of N,Fe-CDs

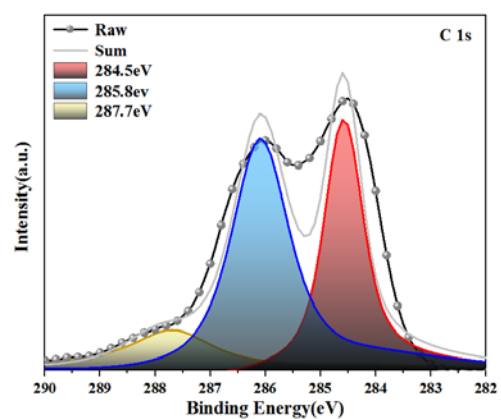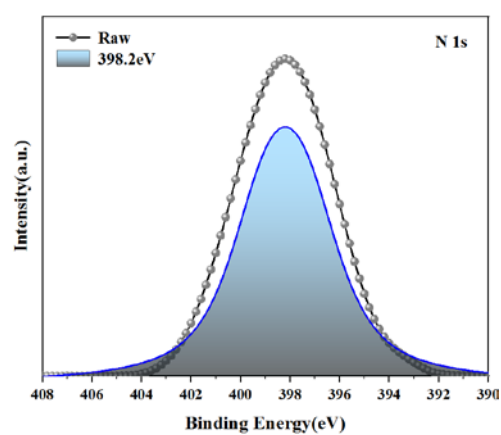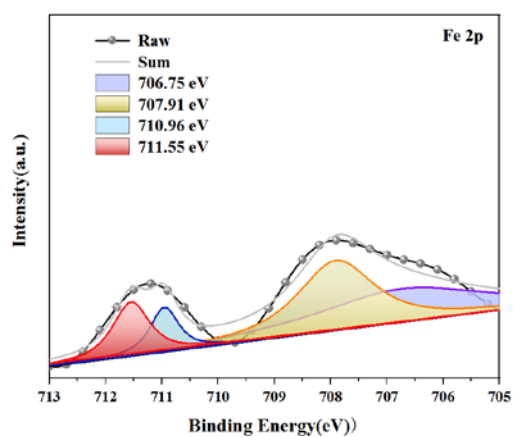

**Figure S3** High-resolution XPS spectra of N,Fe-CDs
